# Supplementary material for: Synthesis of Silver Nanoparticles from Extracts of Wild Ginger (Zingiber zerumbet) with Antibacterial Activity against Selective Multidrug Resistant Oral Bacteria
Source: Molecules. 2022 Mar 21;27(6):2007. doi: 10.3390/molecules27062007 (PMC8949094; doi:10.3390/molecules27062007)
Supplement: Supplementary file 1 [file molecules-27-02007-s001.zip › molecules-1634947-supplementary.pdf]

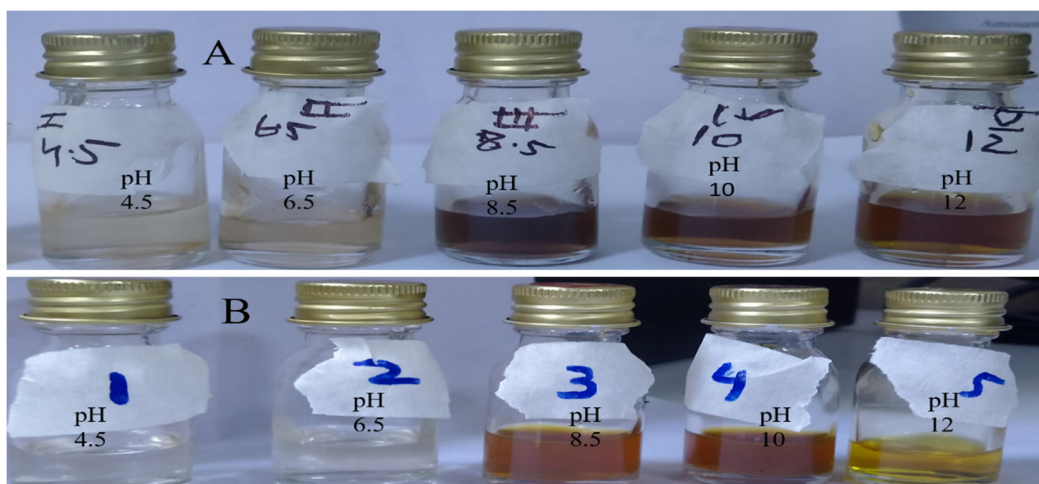

**Figure S1.** Visual observation of color changes at variation of pH after 24 hours biosynthesized silver nanoparticles using (A) aqueous extracts and (B) organic extracts of *Z. zerumbet*.

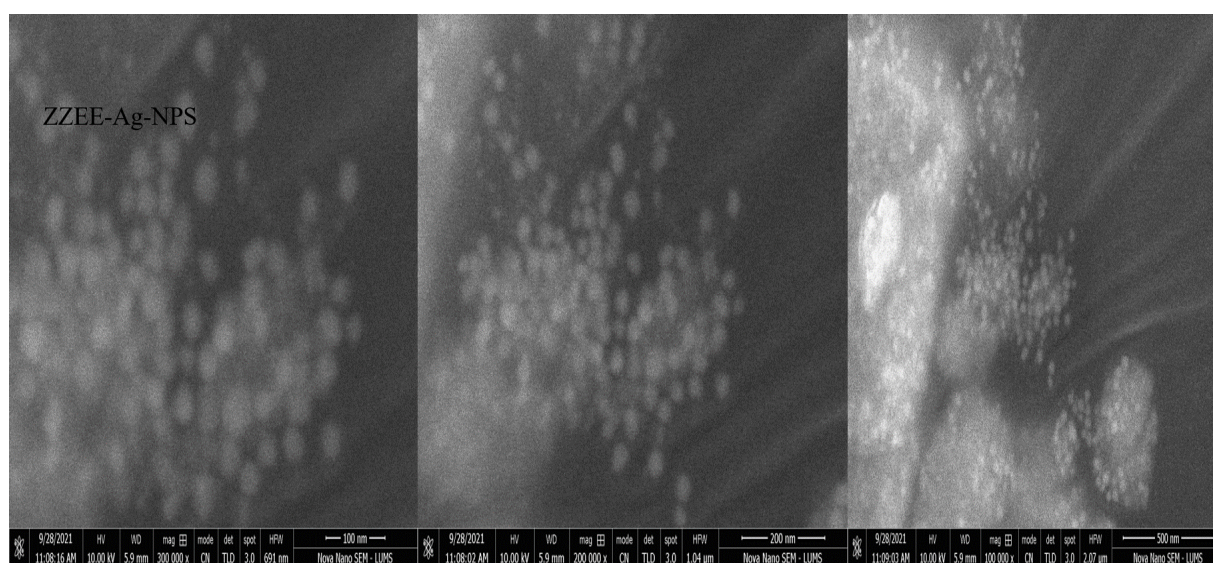

**Figure S2.** SEM micrograph showing the shape of AgNPs synthesized from ZZEE at different magnification.

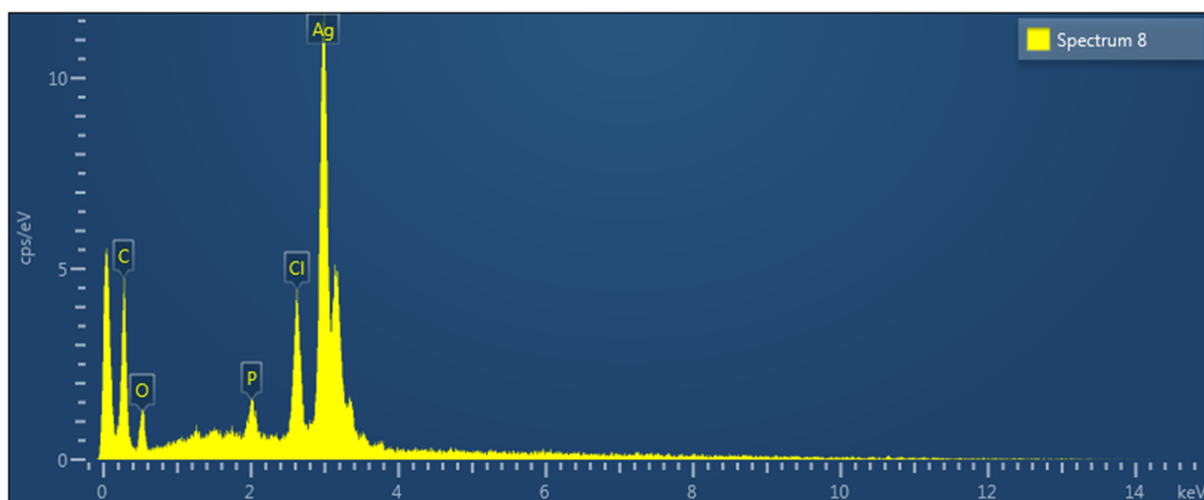

**Figure S3.** EDX spectra demonstrating the quantitative amount of different element in the synthesized silver nanoparticle using organic extract of *Z. zerumbet*.

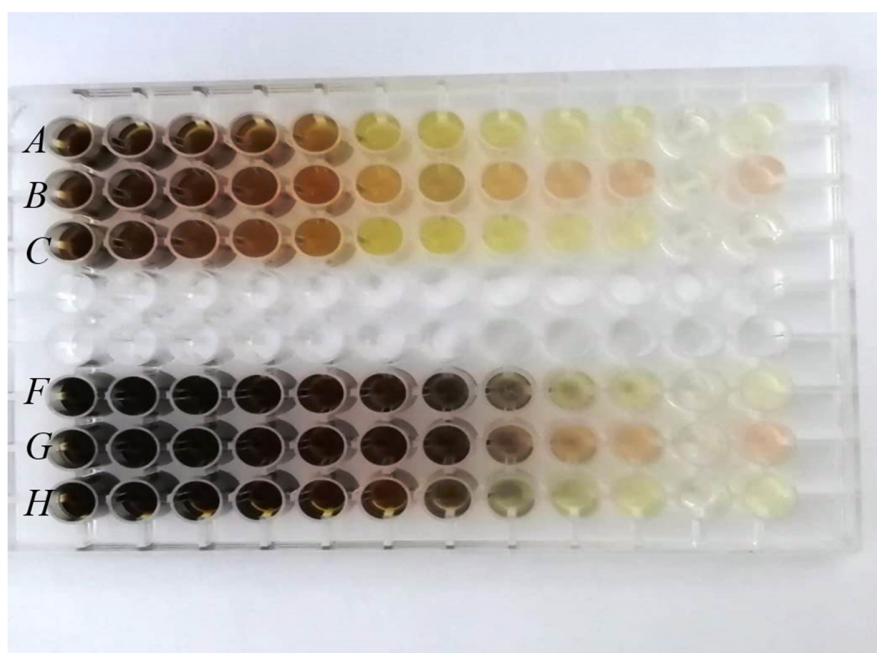

**Figure S4.** Micro-titer plates showing MIC top three row of silver nanoparticles using aqueous extract and bottom three rows of Ag-NPs using organic extract. Top Three rows A–C: *Staphylococcus aureus*, *Enterococcus faecalis* and *Streptococcus mutans*, the bottom three rows F–H: *Staphylococcus aureus*, *Enterococcus faecalis* and *Streptococcus mutans*. Columns 1-10: contain two-fold serial dilutions top three rows 50 $\mu$ g/ml ZZEE Ag-NPS and three bottom rows 50 $\mu$ g/ml synthesize ZZAE-Ag-NPs respectively. Column 11: NG (negative control well), Columns 12: PG (positive Control wells).

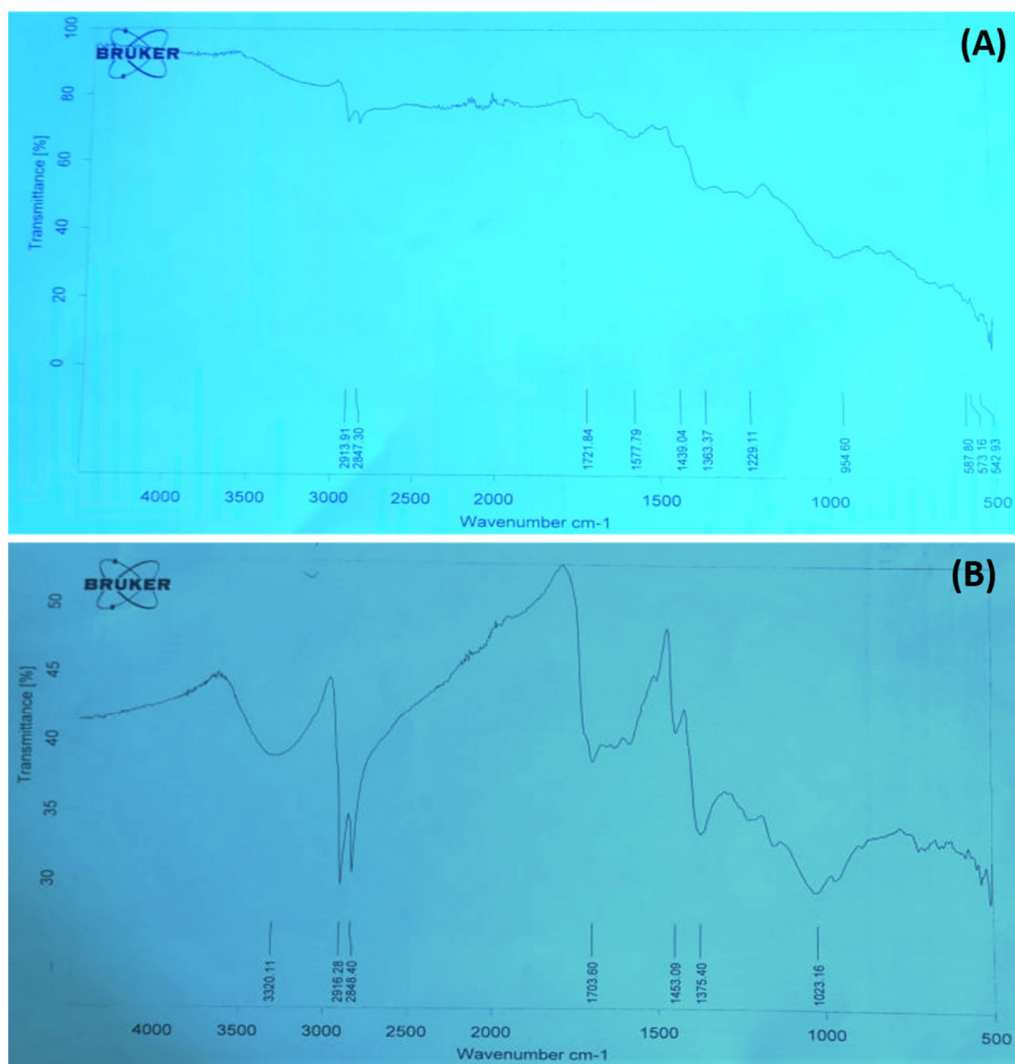

**Figure S5.** ATR- FTIR spectra (A) biosynthesized AgNPs using organic extract of *Z. zerumbet*. (B) biosynthesized AgNPs using aqueous extract of *Z. zerumbet*.

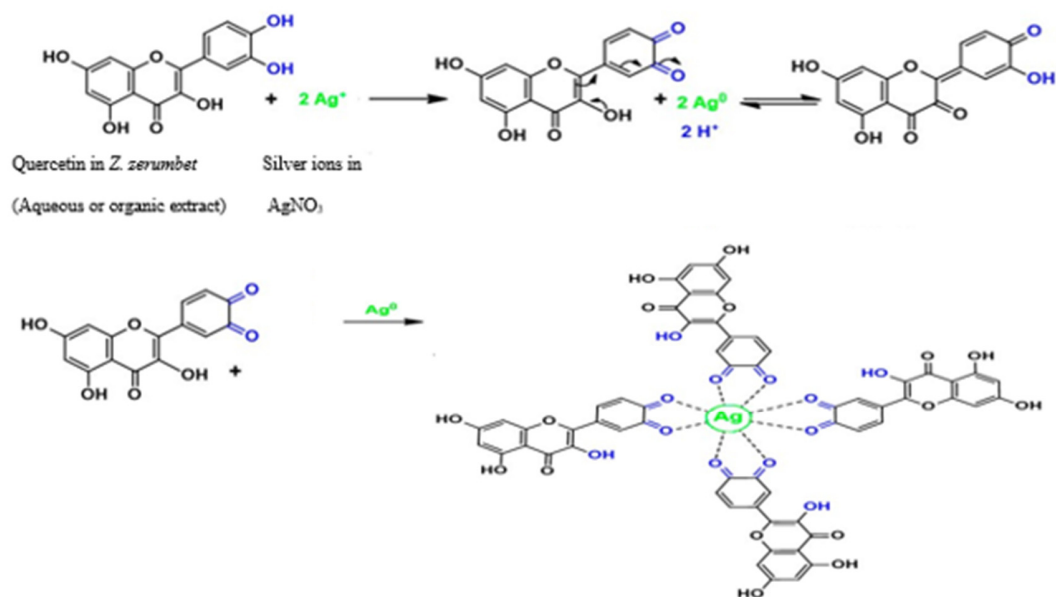

**Figure S6.** Mechanism for silver ion reduction to metallic silver nanoparticles via quercetin as reducing agent in *Z. zerumbet* Rhizome extract solution.

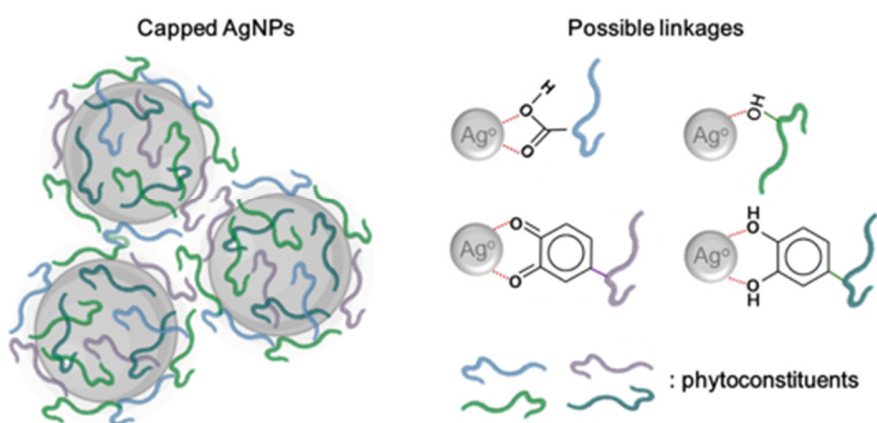

**Figure S7.** Schematic illustration of biosynthesized silver nanoparticle (ZZEE-Ag-NPs and ZZAE-Ag-NPs) Capped by phytoconstituents through carboxyl, hydroxyl and silver interactions.

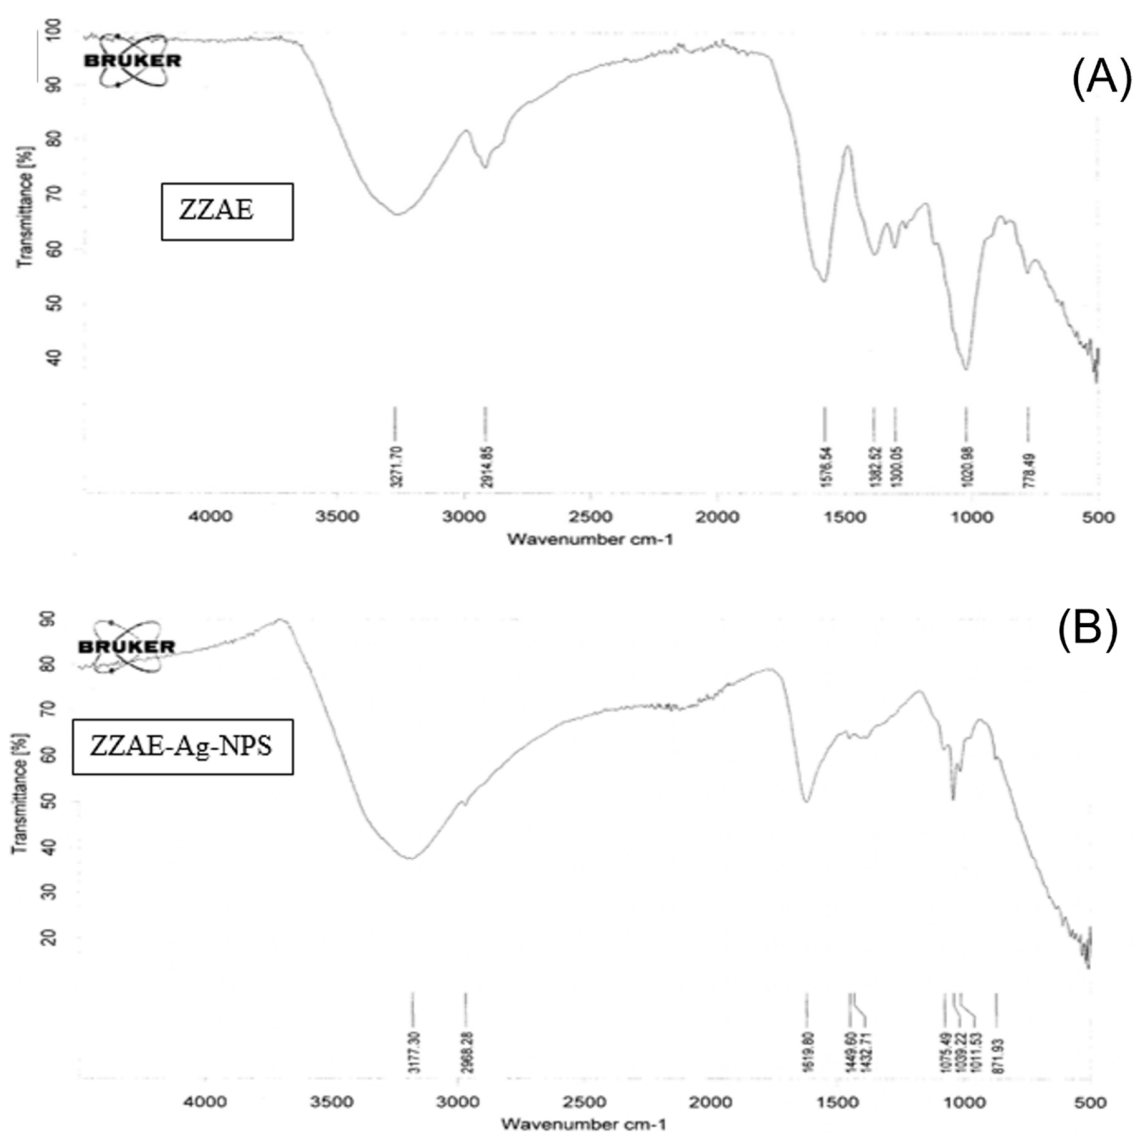

**Figure S8.** ATR-FTIR Spectra for (A) ZZEE and resultant ZZEE-Ag-NPs and (B) ZZAE and Their ZZAE-AG-NPs.

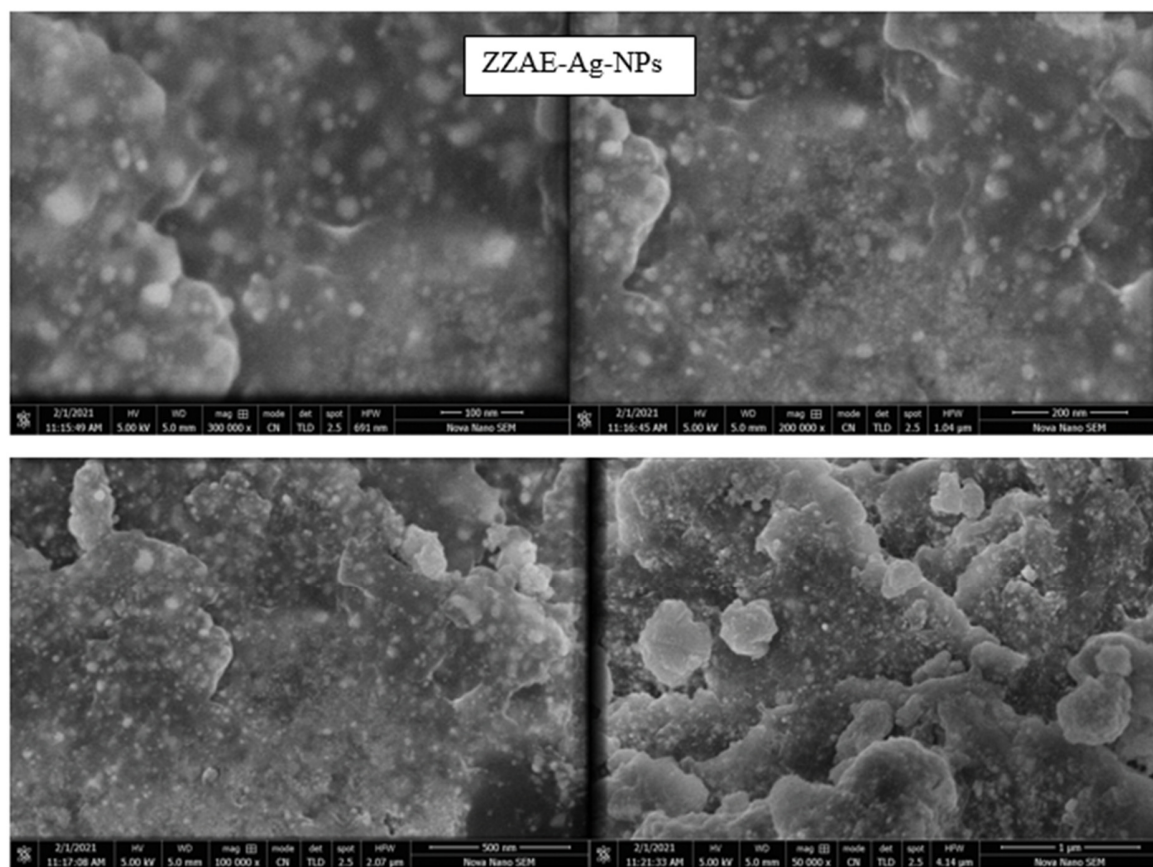

**Figure S9.** SEM micrograph showing the shape of AgNPs synthesized from ZZAE and ZZEE at different magnification.

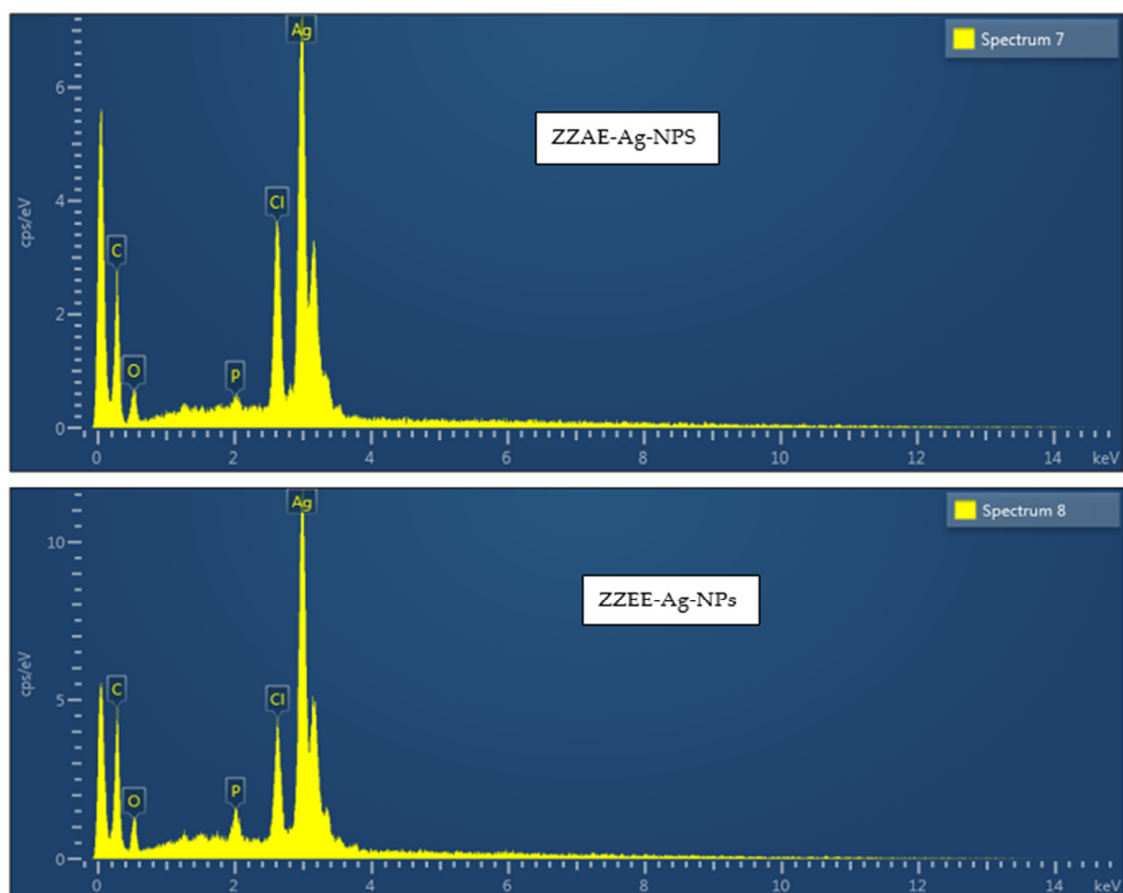

**Figure S10.** EDX spectra demonstrating the quantitative number of different elements in the synthesized silver nanoparticle using an aqueous and organic extract of *Z. zerumbet*.

**Table S1.** Antibacterial efficacy of commercial antibiotics against *E. coli*, *Salmonella enterica* and *S. aureus*.

| <i>Sr. No.</i> | <i>Pathogens Species</i>     | <i>Antibiotics</i> | <i>Zone of Inhibition (mm)</i> |
|----------------|------------------------------|--------------------|--------------------------------|
| 1              | <i>Enterococcus faecalis</i> | Amoxicillin        | -                              |
|                |                              | Azocillin          | -                              |
|                |                              | Cloxacillin        | -                              |
|                |                              | Oxacillin          | -                              |
|                |                              | Ticarcillin        | -                              |
| 2              | <i>Streptococcus mutans</i>  | Amoxicillin        | -                              |
|                |                              | Azocillin          | -                              |
|                |                              | Cloxacillin        | -                              |
|                |                              | Oxacillin          | -                              |
|                |                              | Ticarcillin        | -                              |
| 3              | <i>S. aureus</i>             | Amoxicillin        | 10                             |
|                |                              | Azocillin          | -                              |
|                |                              | Cloxacillin        | -                              |
|                |                              | Oxacillin          | -                              |
|                |                              | Ticarcillin        | -                              |

Abbreviations: Ax<sub>25</sub> (Amoxicillin), Az<sub>75</sub> (Azocillin), Cx<sub>1</sub> (Cloxacillin), Ox<sub>1</sub> (Oxacillin), Ti<sub>75</sub> (Ticarcillin).

**Table S2.** Abbreviation and their detail.

| Abbreviations | Detail                                                                                  |
|---------------|-----------------------------------------------------------------------------------------|
| AgNPs         | Silver nanoparticles                                                                    |
| ZZEE-AgNPs    | Synthesized silver nanoparticles using organic or ethanol extract of <i>Z. zerumbet</i> |
| ZZAE-AgNPs    | Synthesized silver nanoparticles using aqueous extract of <i>Z. zerumbet</i>            |
| ZZAE          | aqueous extract of <i>Z. zerumbet</i>                                                   |
| ZZAQE-AgNPs   | Synthesized silver nano particles using aqueous extract of <i>Z. zerumbet</i>           |
| ZZEE          | Organic or ethanol extract of <i>Z. zerumbet</i>                                        |
| Mg            | Milligram                                                                               |
| ml            | Milliliter                                                                              |
| MIC           | Minimum Inhibitory Concentration                                                        |
| MDR           | Multidrug resistance                                                                    |
| OD            | Optical density                                                                         |
| mM            | Milli-mole                                                                              |
| Rpm           | Revolution per minutes                                                                  |
| v/v           | Volume by volume                                                                        |
| w/v           | Weight by volume                                                                        |
| °C            | Centigrade                                                                              |
